# Supplementary material for: Nuclear Translocation of SGPP-1 and Decrease of SGPL-1 Activity Contribute to Sphingolipid Rheostat Regulation of Inflammatory Dendritic Cells
Source: Hindawi journal article supplement (doi:10.1155/2017/5187368), 2017-01-01

# Supplementary 3

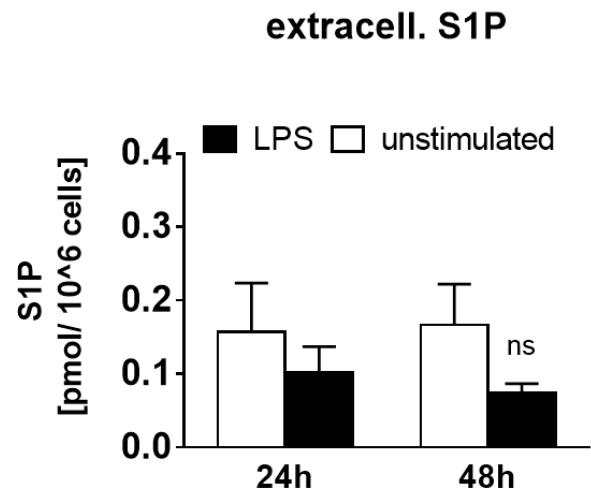

Supplement: f3 [file 5187368.f3.pdf]
